# Supplementary material
Source: MDPI journal article supplement (https://www.mdpi.com/2073-445X/13/3/329)
Supplement: s1 [file s1 › land-2860304-supplementary.pdf]

### Policy content analysis unit

| Hierarchy         | Number | Name of the policy                                                                                                                                                                                                                                                   |
|-------------------|--------|----------------------------------------------------------------------------------------------------------------------------------------------------------------------------------------------------------------------------------------------------------------------|
| National policies | 1      | Land Administration Law of the People's Republic of China                                                                                                                                                                                                            |
|                   | 2      | Several Opinions of the State Council on Promoting the Healthy Development of Small Towns (ZF [2000] No.11)                                                                                                                                                          |
|                   | 3      | Notice of the Ministry of Land and Resources on Strengthening Land Management and Promoting the Healthy Development of Small Towns (GTZF [2000] No.337)                                                                                                              |
|                   | 4      | Several Opinions of the State Council on Promoting the Healthy Development of Small Towns (No.12 [2001] of the State Council)                                                                                                                                        |
|                   | 5      | Decision of the State Council on Deepening Reform and Strict Land Management (GF [2004] No.28)                                                                                                                                                                       |
|                   | 6      | Opinions of the Ministry of Land and Resources on Regulating the Pilot Work of Linking the Increase of Urban Construction Land with the Reduction of Rural Construction Land (GTZF [2005] No.207)                                                                    |
|                   | 7      | Notice of the Ministry of Land and Resources on Further Standardizing the Pilot Work of Linking the Increase and Decrease of Urban and Rural Construction Land (GTZF [2007] No.169)                                                                                  |
|                   | 8      | Administrative Measures for the Pilot Project of Linking the Increase and Decrease of Urban and Rural Construction Land (GTZF [2008] No.138)                                                                                                                         |
|                   | 9      | Notice of the Ministry of Land and Resources on Strengthening the Verification of the Overall Land Use Planning Results at the City, County and Township Levels (UNCDF [2010] No.8)                                                                                  |
|                   | 10     | Notice of the State Council on Strictly Regulating the Pilot Project of Linking the Increase and Decrease of Urban and Rural Construction Land and Effectively Doing a Good Job in Rural Land Consolidation (GF [2010] No.47)                                        |
|                   | 11     | General Arrangement of the Ministry of Land and Resources on Promoting Land Consolidation Planning (GTZF [2010] No.162)                                                                                                                                              |
|                   | 12     | Notice of the Ministry of Land and Resources on Strictly Regulating the Pilot Work of Linking the Increase and Decrease of Urban and Rural Construction Land (GTZF [2011] No.224)                                                                                    |
|                   | 13     | Notice of the Ministry of Land and Resources on Doing a Solid Job in the Pilot Project of Linking the Increase and Decrease of Urban and Rural Construction Land and Filling in the Data of Rural Land Consolidation, Clearance and Inspection (GTZLH [2011] No.220) |
|                   | 14     | Notice of the Ministry of Land and Resources on Strengthening the Online Supervision of the Pilot Project of Linking the Increase and Decrease of Urban and Rural Construction Land (GTZLH [2011] No.975)                                                            |
|                   | 15     | Several Opinions of the Central Committee of the Communist Party of China and the State Council on Accelerating the Development of Modern Agriculture and Further Enhancing the Vitality of Rural Development (No.1, 2013)                                           |

|                     |                                                                                                                                                                                                                                                         |
|---------------------|---------------------------------------------------------------------------------------------------------------------------------------------------------------------------------------------------------------------------------------------------------|
| 16                  | Notice of the Ministry of Finance on Fiscal and Tax Policies Related to the Pilot Project of Linking the Increase and Decrease of Urban and Rural Construction Land (Cai Zong [2014] No.7)                                                              |
| 17                  | Guiding Opinions of the Ministry of Land and Resources on Promoting Land Conservation and Intensive Use (GTZF [2014] No.119)                                                                                                                            |
| 18                  | Notice of the Ministry of Land and Resources on Issuing the Indicators Linked to the Increase and Decrease of Urban and Rural Construction Land in 2015                                                                                                 |
| 19                  | Notice of the Ministry of Land and Resources on Making Good Use of the Policy of Linking Increase and Decrease to Actively Support Poverty Alleviation and Development and Poverty Alleviation and Relocation (GTZG [2016] No.2)                        |
| 20                  | The Ministry of Finance issued the Notice on Financial Issues Related to Linking the Increase and Decrease of Urban and Rural Construction Land to Support Poverty Alleviation and Relocation (Cai Zong [2016] 36)                                      |
| 21                  | Notice of the Ministry of Land and Resources on Further Using the Policy of Linking Increase and Decrease to Support Poverty Alleviation (GTZF [2017] No.41)                                                                                            |
| Provincial policies | Administrative Measures for Linking the Increase of Urban Construction Land and the Decrease of Rural Construction Land in Shandong Province (Trial) (LGTZF [2006] No.111)                                                                              |
|                     | Pilot Administrative Measures for Linking the Increase of Urban Construction Land with the Decrease of Rural Construction Land in Tianjin (Trial) (GTFZ [2006] No.1146)                                                                                 |
|                     | Administrative Measures of Guangdong Province on Linking the Increase and Decrease of Urban and Rural Construction Land (YGTZF [2006] No.179)                                                                                                           |
|                     | Administrative Measures for the Pilot Project of Linking the Increase and Decrease of Urban and Rural Construction Land in Sichuan Province (CGTZF [2008] No.68)                                                                                        |
|                     | Notice of the Department of Land and Resources of Liaoning Province on the Implementation Measures for the Pilot Project of Linking the Increase and Decrease of Urban and Rural Construction Land in Liaoning Province (Interim) (LGTZF [2008] No.153) |
|                     | Administrative Measures for the Pilot Project of Linking the Increase and Decrease of Urban and Rural Construction Land in Shaanxi Province (Trial) (SGTZBF [2009] No.96)                                                                               |
|                     | Interim Measures for the Pilot Project of Linking the Increase and Decrease of Urban and Rural Construction Land in Henan Province (Yu Zheng Ban [2009] No.124)                                                                                         |
|                     | Administrative Measures for the Pilot Project of Linking the Increase and Decrease of Urban and Rural Construction Land (NGTZF [2009] No.309)                                                                                                           |
|                     | Measures for the Pilot Management of Linking the Increase and Decrease of Urban and Rural Construction Land in Tianjin (JGTFG [2009] No.2)                                                                                                              |

31 Pilot Management Measures of Shanghai Municipality on Linking the  
 Increase and Decrease of Urban and Rural Construction Land (Trial) (2009)  
 Notice on Forwarding the Opinions of the Provincial Department of Land  
 32 and Resources on Implementing the Linkage between Rural Land  
 Consolidation and Urban and Rural Construction Land Increase and  
 Decrease (Fujian Administration Office [2010] 43)  
 Notice of the Department of Land, Environment and Resources of Hainan  
 33 Province on the Pilot Management Measures for Linking the Increase and  
 Decrease of Urban and Rural Construction Land in Hainan Province  
 (QTHZYZ [2010] No.23)  
 Notice of the Department of Land and Resources of Liaoning Province on  
 34 Issues Related to Accelerating the Pilot Work of Linking the Increase and  
 Decrease of Urban and Rural Construction Land (LGTZBF [2010] No.62)  
 Opinions on Deeply Developing the Comprehensive Improvement of Rural  
 35 Land and Firmly Promoting the Construction of New Socialist Countryside  
 (Zhe Wei Ban [2010] No.1)  
 Notice of the Department of Land and Resources of Zhejiang Province on  
 36 Accelerating the Implementation of Rural Land Comprehensive  
 Improvement Project (ZTZF [2010] No.14)  
 Work Plan for the Pilot Project of Linking the Increase and Decrease of  
 37 Urban and Rural Construction Land and the Clearance and Inspection of  
 Rural Land Consolidation in Liaoning Province (LGTZF [2011] No.23)  
 Work Plan for the Pilot Project of Linking the Increase and Decrease of  
 38 Urban and Rural Construction Land and the Clearance and Inspection of  
 Rural Land Consolidation in Guangdong Province (YGTZJF [2011] No.45)  
 Implementation Plan for the Pilot Project of Linking the Increase and  
 39 Decrease of Urban and Rural Construction Land and the Clearance and  
 Inspection of Rural Land Consolidation in Shaanxi Province (SGTZGF  
 [2011] No.19)  
 Supplementary Opinions on the Implementation of Rural Land  
 40 Consolidation and the Linkage between Urban and Rural Increase and  
 Decrease (Min Zheng Ban [2011] No.197) 2 I  
 Implementation Plan for the Pilot Project of Linking the Increase and  
 41 Decrease of Urban and Rural Construction Land and the Clearance and  
 Inspection of Rural Land Consolidation in Shanxi Province (GTZF [2011]  
 No.99)  
 Notice of the General Office of the People's Government of Inner Mongolia  
 Autonomous Region on Issuing the Work Program for the Pilot Project of  
 42 Linking the Increase and Decrease of Urban and Rural Construction Land  
 in Inner Mongolia Autonomous Region and the Clearance and Inspection of  
 Land Consolidation in Rural and Pastoral Areas (No.14, 2011)  
 Opinions of CPC Hubei Provincial Committee and Hubei Provincial  
 43 People's Government on Strengthening Rural Land Consolidation (E Fa  
 [2011] No.7)

44 Interim Measures for the Management of Pilot Projects of Linking the  
Increase and Decrease of Urban and Rural Construction Land in Guizhou  
Province (QGTZF [2011] No.44)

45 Work Plan for the Pilot Project of Linking the Increase and Decrease of  
Urban and Rural Construction Land and Rural Land Consolidation and  
Clearance in Hunan Province (2011)

46 Work Plan for the Pilot Project of Linking the Increase and Decrease of  
Urban and Rural Construction Land and the Clearance and Inspection of  
Rural Land Consolidation in Shandong Province (2011)

47 Notice of Chongqing Municipal Land and Housing Administration on  
Forwarding the Online Supervision of the Ministry of Land and Resources  
on Strengthening the Pilot Work of Linking the Increase and Decrease of  
Urban and Rural Construction Land (YGTFGF [2011] No.237)

48 Notice of Chongqing Municipal People's Government on Implementing the  
Notice of the State Council on Strictly Regulating the Pilot Project of  
Linking the Increase and Decrease of Urban and Rural Construction Land  
and Effectively Doing a Good Job in Rural Land Consolidation (Yu Fu Fa  
[2011] No.58)

49 Implementation Opinions of Jiangsu Provincial People's Government on  
Strictly Regulating the Pilot Project of Linking the Increase and Decrease of  
Urban and Rural Construction Land and Effectively Doing a Good Job in  
Rural Land Consolidation (Su Zheng Fa [2011] No.68)

50 Interim Measures for the Implementation and Management of the Pilot  
Project Area of Linking the Increase and Decrease of Urban and Rural  
Construction Land in Shandong Province (Trial) (Lu Guo Tu Zi Fa [2012]  
No.8)

51 Notice of the Department of Land and Resources of Guangxi on  
Standardizing the Establishment, Planning and Design of the Pilot Project  
of Linking the Increase and Decrease of Urban and Rural Construction  
Land (GTZF [2012] No.4)

52 Notice of the General Office of the People's Government of Hebei Province  
on Issuing the Interim Measures for the Pilot Management of Linking the  
Increase and Decrease of Urban and Rural Construction Land in Hebei  
Province (BZ [2012] No.112)

53 Notice of the General Office of the People's Government of Anhui Province  
on the Pilot Work of Linking the Increase and Decrease of Urban and Rural  
Construction Land (2013)

54 Pilot Management Measures for Linking the Increase and Decrease of  
Urban and Rural Construction Land in Qinghai Province (2013)

55 Notice of the Department of Land and Resources of Fujian Province on  
Linking the Reclamation of Old Villages with the Increase and Decrease of  
Urban and Rural Construction Land (MTZZ [2013] No.329)

56 Notice of the Department of Land and Resources of Jiangxi Province on  
Further Standardizing and Promoting the Pilot Work of Linking Increase

and Decrease to Effectively Safeguard the Legitimate Rights of Farmers (GTZZ [2013] No.182)

57 Opinions of the General Office of the People's Government of Sichuan Province on Further Strengthening the Conservation and Intensive Use of Land (CBF [2014] No.84)

58 Opinions on the Paid Use of Operational Construction Land Indicators and Urban and Rural Construction Land Increase and Decrease Linked Indicators (Qing Zheng Ban [2014] No.140)

59 Pilot Management Measures for Linking the Increase and Decrease of Urban and Rural Construction Land in Shandong Province (Lu Guo Tu Zi Gui [2015] No.1)

60 Notice of the General Office of the People's Government of Jilin Province on Issuing the Pilot Management Measures for Linking the Increase and Decrease of Urban and Rural Construction Land in Jilin Province (JZBF [2015] No.59)

61 Opinions of the General Office of Sichuan Provincial People's Government on Optimizing the Pilot Reform of Linking the Increase and Decrease of Urban and Rural Construction Land (2015)

62 Interim Measures of Guangxi Zhuang Autonomous Region for the Paid Use of Savings Indicators Linked to the Increase and Decrease of Urban and Rural Construction Land in 35 Counties (Districts) Included in the Guangxi Implementation Plan for Regional Development and Poverty Alleviation in Yunnan-Guizhou-Guizhou Rocky Desertification Area (GTZG [2015] No.10)

63 Interim Measures for the Administration of the Transfer and Use of Savings Indicators Linked to the Increase and Decrease of Urban and Rural Construction Land in Anhui Province (WGTZ [2016] No.154)

64 Notice of the Department of Land and Resources of Anhui Province on Making Good Use of the Policy of Linking Increase and Decrease to Actively Support Poverty Alleviation and Development and Poverty Alleviation and Relocation (WGTZ [2016] No.44)

65 Measures for the Management of Special Funds for the Increase and Decrease of Urban and Rural Construction Land in Jiangsu Province (2016)

66 Interim Rules for Transaction of Savings Turnover Indicators Linked to Increase and Decrease of Urban and Rural Construction Land in Guangxi Zhuang Autonomous Region (GTZG [2016] No.7)

67 Several Opinions on Supporting the Development of Village-level Collective Economy Issued by Heilongjiang Province (2017)

68 Notice of the General Office of the Provincial Government on the Issuance of the Interim Measures for the Management of the Circulation and Use of Savings Indicators Linked to Increase and Decrease in Jiangsu Province (Su Zheng Ban Fa [2017] 101)

69 Opinions of the Department of Land and Resources of Yunnan Province on Implementing the Policy of Linking the Increase and Decrease of Urban and Rural Construction Land to Support Poverty Alleviation (2017)

|                                      |    |                                                                                                                                                                                                                                                    |
|--------------------------------------|----|----------------------------------------------------------------------------------------------------------------------------------------------------------------------------------------------------------------------------------------------------|
| City and<br>county level<br>policies | 70 | Notice of the Department of Land and Resources of Jiangxi Province on the Interim Measures for the Implementation and Management of Linking the Increase and Decrease of Urban and Rural Construction Land in Jiangxi Province (GGTZF [2017] No.1) |
|                                      | 71 | Notice of Jiangxi Provincial Department of Land and Resources on the Follow-up Work of the Transfer of Savings Indicators Linked to the Increase and Decrease of Urban and Rural Construction Land (2017)                                          |
|                                      | 72 | Pilot Management Measures for Linking the Increase and Decrease of Urban and Rural Construction Land in Lucheng City (2008)                                                                                                                        |
|                                      | 73 | Implementation Measures for Linking Increase and Decrease of Urban and Rural Construction Land in Ningbo (YTZF [2009] No.167)                                                                                                                      |
|                                      | 74 | Management Measures for Municipal Working Capital of Linyi Urban and Rural Construction Land Increase and Decrease Linked Project (2010)                                                                                                           |
|                                      | 75 | Implementation Plan for Pilot Project Area of Linking Increase and Decrease of Urban and Rural Construction Land in Huinong District of Shizuishan City (2010)                                                                                     |
|                                      | 76 | Opinions of Fuzhou City on Further Standardizing the Transaction of Indicators Linked to the Increase and Decrease of Urban and Rural Construction Land (2011)                                                                                     |
|                                      | 77 | Notice of Xiantao City on Effectively Linking the Increase and Decrease of Urban and Rural Construction Land (2011)                                                                                                                                |
|                                      | 78 | Detailed Rules for Assessment of Reclamation Work Linked with Increase and Decrease of Urban and Rural Construction Land in Dongtai City (Trial) (2011)                                                                                            |
|                                      | 79 | Implementation Opinions of Jiande City on Deeply Developing Comprehensive Improvement of Rural Land (2011)                                                                                                                                         |
|                                      | 80 | Detailed Rules for the Implementation of the Management of the Use of Funds for Rural Land Renovation and the Increase and Decrease of Urban and Rural Construction Land in Jianning County (2011)                                                 |
|                                      | 81 | Opinions on Actively Promoting and Standardizing the Pilot Work of Linking the Increase and Decrease of Urban and Rural Construction Land in Xiangyang City (Xiangyang Zhengfa [2011] No.22)                                                       |
|                                      | 82 | Measures for the Management of Demolition, Construction and Land Reclamation in the Pilot Project Area of Linking the Increase and Decrease of Urban and Rural Construction Land in Pingluo County (2011)                                          |
|                                      | 83 | Notice of the Office of the People's Government of Yuqing County on the Interim Measures for the Management of Funds for the Pilot Project of Linking the Increase and Decrease of Urban and Rural Construction Land                               |
|                                      | 84 | Opinions of Fuzhou City on Further Standardizing the Transaction of Indicators Linked to the Increase and Decrease of Urban and Rural Construction Land (2011)                                                                                     |
|                                      | 85 | Notice of Xiangzhou District, Xiangyang City, Hubei Province on Accelerating the Linkage between the Increase and Decrease of Urban and Rural Construction Land (2012)                                                                             |

86 Interim Measures for the Management of Urban and Rural Construction  
Land Increase and Decrease Linked Projects in Yongjia County (2012)

87 Implementation Plan for Linking Old Village Reclamation with Increase  
and Decrease of Urban and Rural Construction Land in Fuan City (An  
Zheng Wen [2012] No.370)

88 Interim Measures for Management of Urban and Rural Construction Land  
Increase and Decrease Linked Projects in Junan County (2012)

89 Implementation Plan for Deepening the Pilot Work of Linking the Increase  
and Decrease of Urban and Rural Construction Land in Lucheng City (2013)

90 Opinions of Fuan Municipal People's Government on Further  
Standardizing the Use and Management of Funds for Rural Land  
Renovation and Urban and Rural Construction Land Increase and Decrease  
Linked Projects (Anzhengwen [2013] 598)

91 Work Plan for the Project of Linking the Increase and Decrease of Urban  
and Rural Construction Land in Shicheng County (2013)

92 Notice of Linyi City on Further Promoting and Regulating the Work  
Program of Linking the Increase and Decrease of Urban and Rural  
Construction Land (Lin Zheng Ban [2013] No.95)

93 Xuancheng Land Ticket Trading Rules (Implementation) (2013)

94 Notice of the People's Government of Changshou District of Chongqing  
Municipality on Further Strengthening the Management of Increase and  
Decrease Linked Projects (Changshou Fu Fa [2013] No.139)

95 Implementation Measures for Project Management of Urban and Rural  
Construction Land Increase and Decrease Linkage in Qianjiang City (2014)

96 Implementation Measures for the Project of Linking Increase and Decrease  
of Urban and Rural Construction Land in Longhui County (2014)

97 Management Measures for Linking the Increase and Decrease of Urban and  
Rural Construction Land in Jiange County (Trial) (Jianfufa [2016] No.9)

98 Implementation Plan for Provincial Transfer and Use of Savings Indicators  
Linked to Increase and Decrease in Suqian City (2016)

99 Work Plan for Linking the Increase and Decrease of Urban and Rural  
Construction Land in Sansui County in 2016 (2016)

100 Review Rules for Implementation Planning of Urban and Rural  
Construction Land Increase and Decrease Linked Project Area in Bazhong  
City (Trial) (2016)

101 Guiding Opinions on the Implementation of the Project Area of Linking the  
Increase and Decrease of Urban and Rural Construction Land in Bazhong  
(Trial) (2016)

102 Rules for Preliminary Inspection of Urban and Rural Construction Land  
Increase and Decrease Linked Projects in Bazhong City (Trial) (2016)

103 Implementation Plan of Land and Resources Bureau of Honghe Prefecture  
on Implementing the Policy of Linking the Increase and Decrease of Urban  
and Rural Construction Land to Support Poverty Alleviation (2017)

104 Opinions on the Implementation of the Project of Linking the Increase and

|     |                                                                             |
|-----|-----------------------------------------------------------------------------|
|     | Decrease of Urban and Rural Construction Land in Nanjiang County (Trial)    |
|     | (NGTZF [2017] No.13)                                                        |
|     | Work Plan for the Implementation of the Project of Linking the Increase and |
| 105 | Decrease of Urban and Rural Construction Land in Dongkou County (Dong       |
|     | Zheng Fa [2017] No.10)                                                      |

---
